# Supplementary material
Source: PubMed Central journal article supplement (PMC10131398)
Supplement: NIHMS1876524-supplement-2.pdf [file NIHMS1876524-supplement-2.pdf]

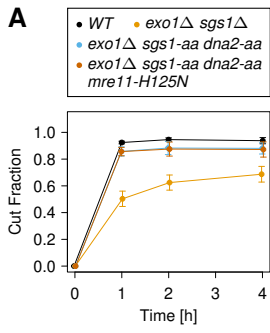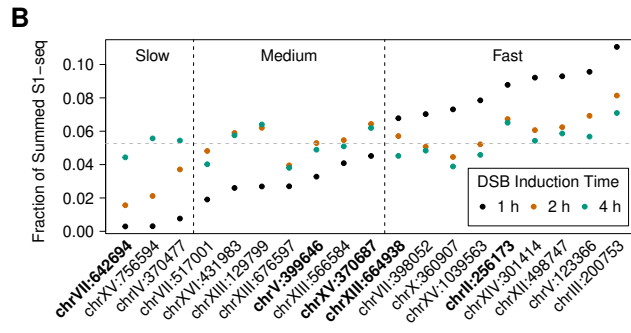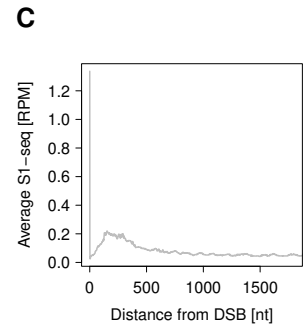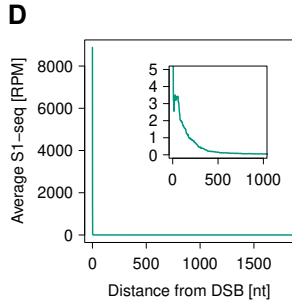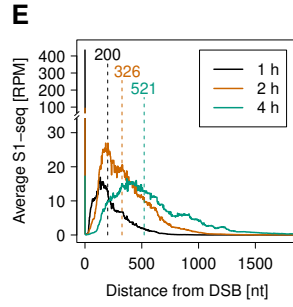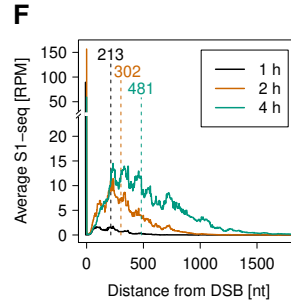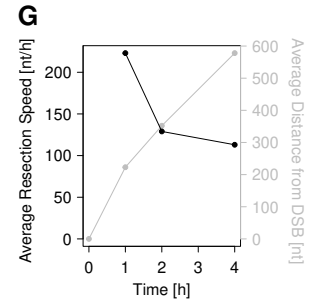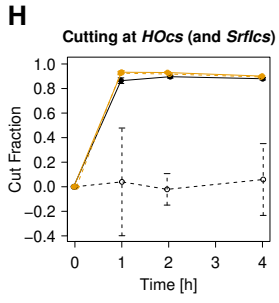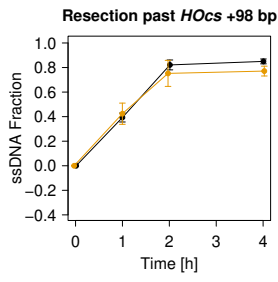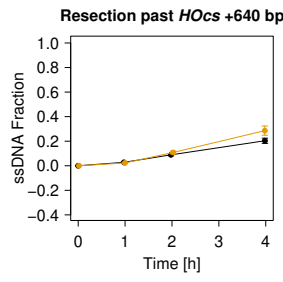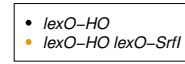

**Figure S1: Monitoring MRX nicking at nucleotide-resolution, related to Figure 1**

**(A)** DSB formation kinetics related to Figure 1B. DSB formation at *MATa hoc::SrfIcs* was monitored in the indicated strains. Data are represented as mean  $\pm$  standard deviation (SD) of three biological replicates.

**(B)** Grouping of DSB formation kinetics into categories “slow”, “medium”, and “fast”. If all DSBs were cut with the same kinetics, the fraction of summed S1-seq coverage around all DSBs would have the same average value (dashed gray horizontal line). Lower and higher values at early time points indicate slow and fast cutting, respectively. DSBs were ordered according to their values at the 1 h time point and manually grouped into kinetic categories. As expected, the values became more equal at later time points, when DSB levels at medium and slowly cut sites had caught up. Genomic coordinates of DSB sites are indicated on the x-axis. Cutting at the DSB sites typeset in bold had been evaluated by qPCR in (Gnügge and Symington, 2020). The ranking of DSB kinetics in this independent assay was the same as shown here, supporting the validity of our approach.

**(C)** Average 51-nt smoothed S1-seq coverage around the 9 most efficiently formed DSBs prior to SrfI induction.

**(D)** Average 51-nt smoothed S1-seq coverage around the 9 most efficiently formed DSBs in a long-range resection suppressed *mre11-H125N* strain (4 h after DSB induction). The inset shows a zoom-in with adjusted y-axis for improved visualization of residual resection.

**(E and F)** Average 51-nt smoothed S1-seq coverage spreading from DSBs with medium (E) and slow (F) formation kinetics, as defined in (B). Numbers above vertical dashed lines indicate average spreading distance from DSBs.

**(G)** Average spreading distance from DSBs (resection tract length) and resection speed over time.

**(H)** MRX nicking activity is not titrated by multiple DSBs. (Left panel) DSB formation at the *MATa HO* cut site (*HOcs*) (solid lines) and at the genomic SrfI cut site at chrII:256173 (dashed lines). (Middle and right panel) Resection past the indicated sites. In the *lexO-HO* strain, only a single DSB is formed at *MATa HOcs*, while 20 additional DSBs are formed in the *lexO-HO lexO-SrfI* strain. Data are represented as mean  $\pm$  SD of three biological replicates.

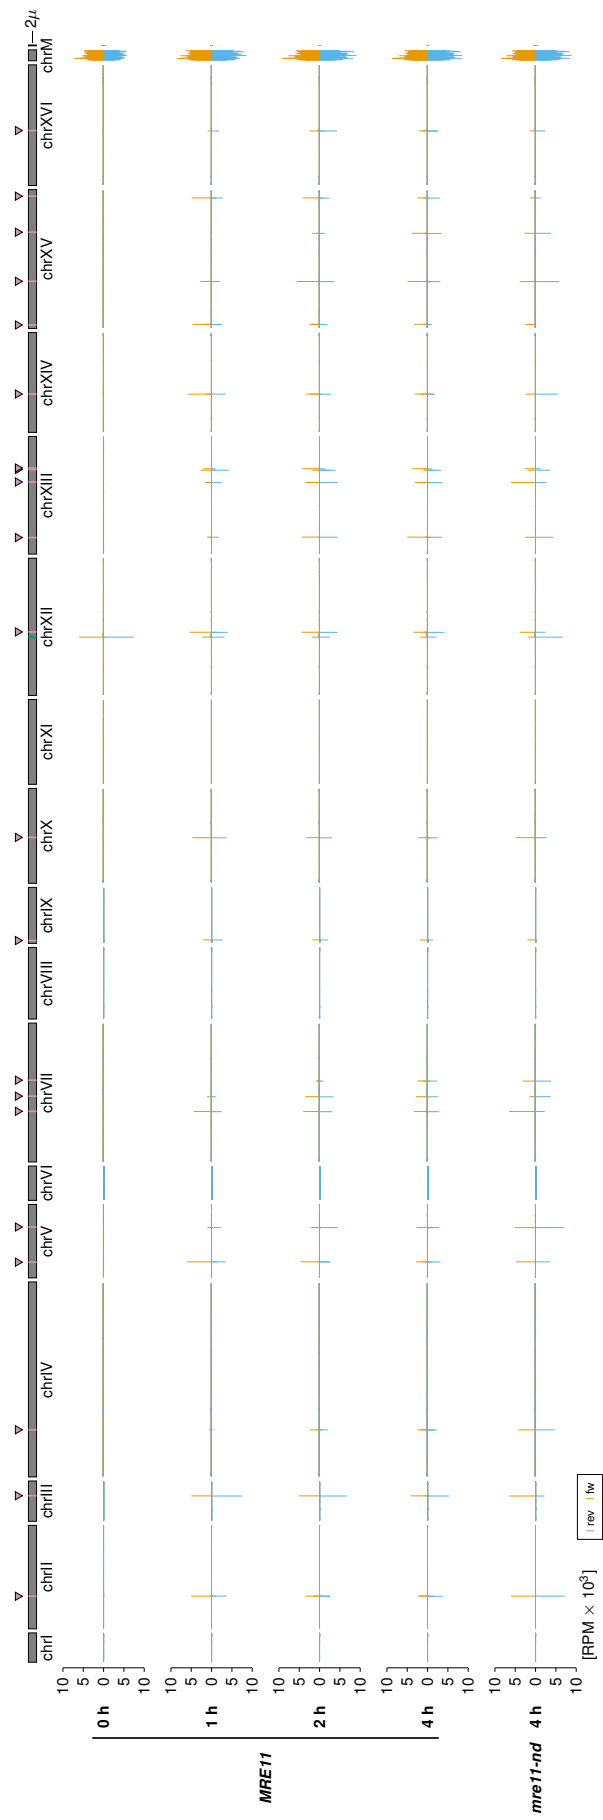

**Figure S2: Genome-wide S1-seq coverage, related to Figure 1**

S1-seq coverage in 1-kb bins is plotted along *S. cerevisiae* chromosomes, mitochondrial DNA (chrM), and the 2-micron plasmid ( $2\mu$ ). On top, chromosomes (gray bars) and SrfI cut site locations (pink lines and triangles) are plotted to scale. Note the DSB-independent S1-seq signal (0 h) at the ribosomal DNA locus (green line on chrXII) and chrM. Also note that S1-seq coverage is absent at telomere ends because we filtered out reads with non-unique mapping (equal alignment score for best and second-best mapping). RPM: reads per million reads.

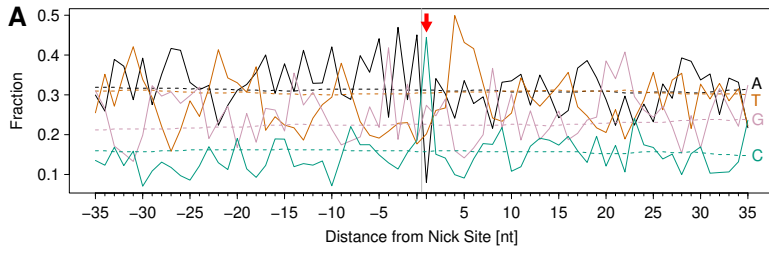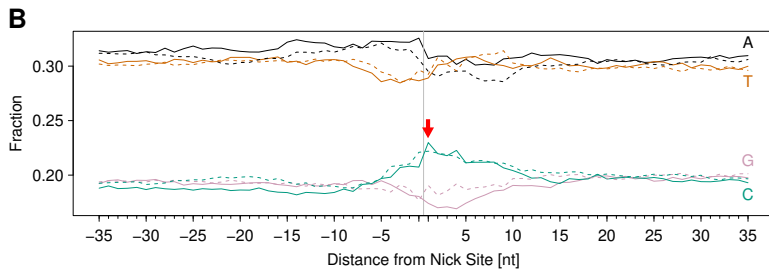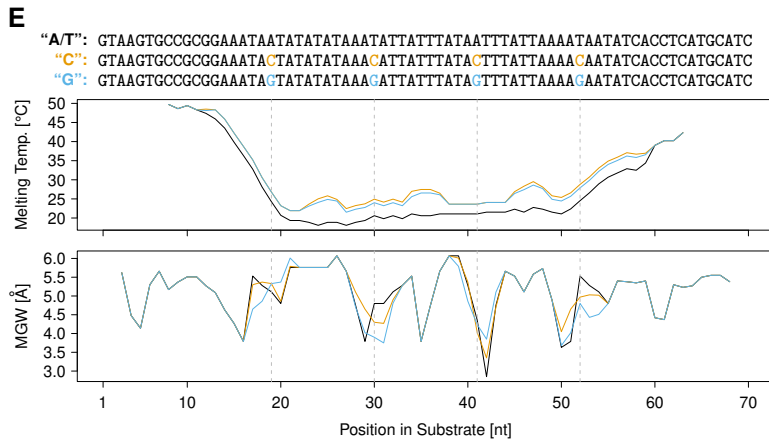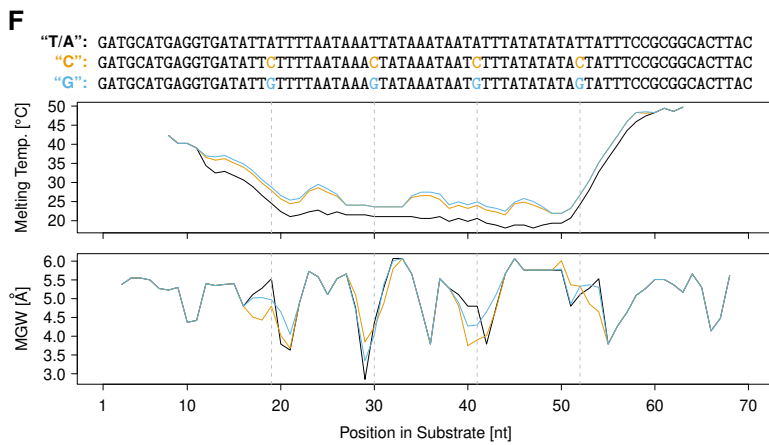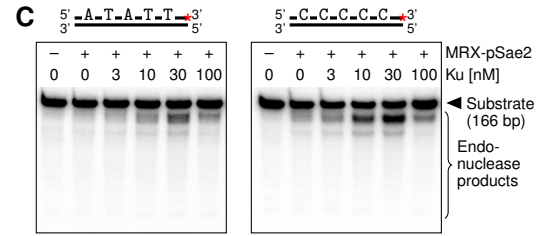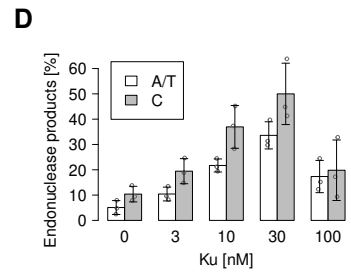

**Figure S3: MRX preferentially nicks at a specific sequence motif, related to Figure 3**

**(A)** *exo1* $\Delta$  *sgs1* $\Delta$  data from (Bazzano et al., 2021), containing MRX nicking information in a 300-bp region upstream of a single DSB, were analyzed as shown in Figure 3A. Color-coded solid and dashed lines show nicking preference (average weighted with coverage scores) and background (unweighted average), respectively. The vertical gray line indicates the nick site and the red arrow highlights the increased C fraction.

**(B)** Wild-type (WT) and *exo1* nuclease-dead (*exo1-nd*) data from (Mimitou et al., 2017), containing resection tract end points next to meiotic DSBs, were analyzed. Only loner Spo11 hotspots (neighboring hotspots at least 3 kb away) were considered. Color-coded solid and dashed lines indicate data from *exo1-nd* (where resection is solely due to MRX nicking) and WT strains (where resection end points derive from a combination of MRX nicking and Exo1-mediated resection), respectively. The vertical gray line indicates the nick site or resection end point for *exo1-nd* and WT, respectively, and the red arrow highlights the increased C fraction. Note that S1-seq also detected unprocessed Spo11-bound DSBs and recombination intermediates in this dataset, which might impact on the observed nucleotide fractions (Mimitou et al., 2017).

**(C)** *In vitro* MRX nicking in the presence of various concentrations of the yeast Ku complex with substrates containing (right panel) or lacking positioned Cs (left panel). The substrate structures are shown on top, and the red asterisks indicate the position of the radioactive label. Note that longer DNA substrates were used as compared to Fig. 3 to avoid that Ku bound at the opposite end might influence the nick positions. The first 53 bp are identical to the substrates used in Fig. 3.

**(D)** Quantification of nicking assays such as shown in (C). Individual values (circles) and means (bar heights)  $\pm$  SD (error bars) of three independent replicates are shown.

**(E)** Melting temperature and minor groove width (MGW) along the DNA substrates used in Fig. 3C-G (top strand).

**(F)** Melting temperature and minor groove width (MGW) along the DNA substrates used in Fig. 3C-D (bottom strand).

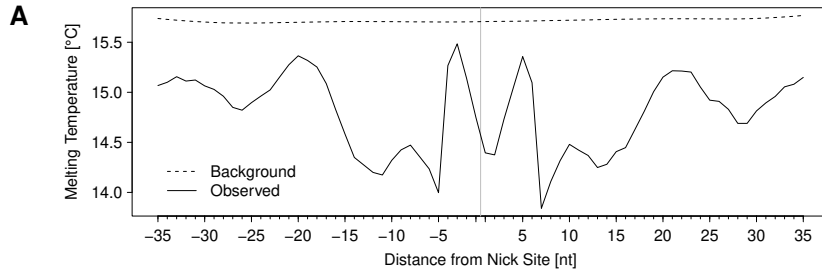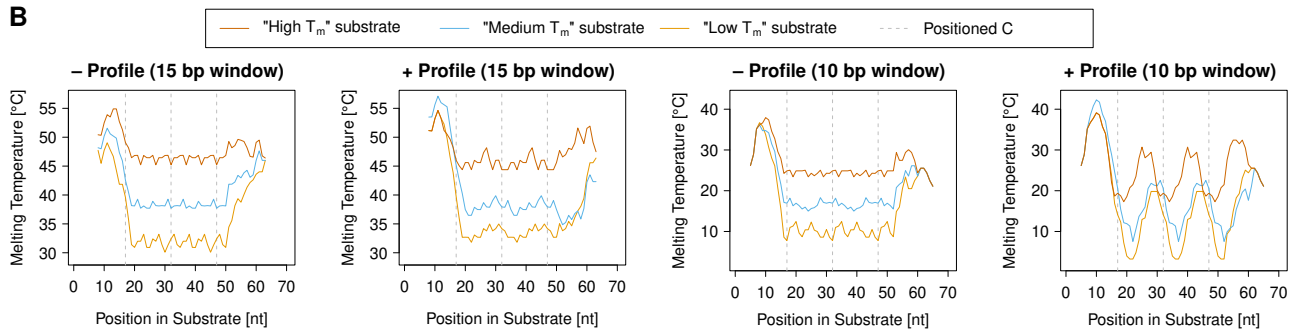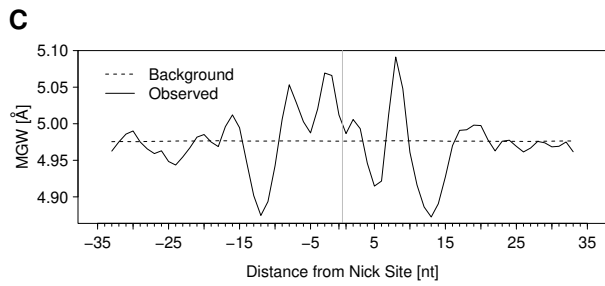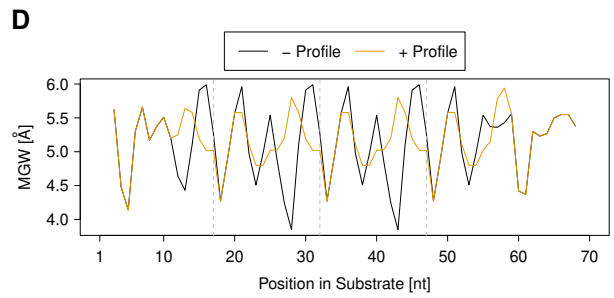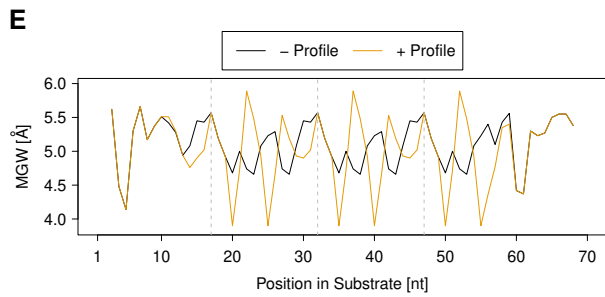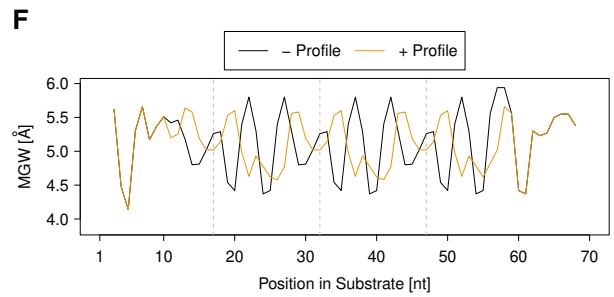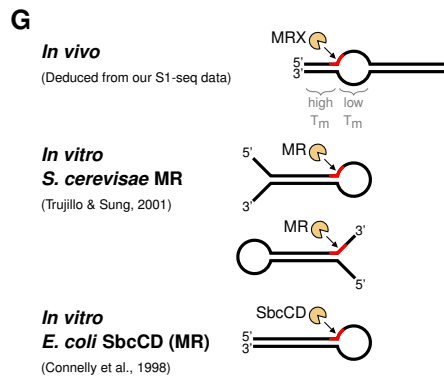

**Figure S4: MRX preferentially nicks DNA with a specific melting temperature profile, related to Figure 4**

**(A)** Melting temperature at indicated distance from the MRX nick site (vertical gray line). Solid and dashed black lines show nicking preference (average weighted with S1-seq score) and background (unweighted average), respectively. Melting temperatures were calculated for 10-bp windows centered at the indicated distance.

**(B)** Melting temperature profiles of the *in vitro* substrates used in Fig. 4C-D. Window sizes for melting temperature calculations are indicated.

**(C)** Minor groove width (MGW) at indicated distance from the MRX nick site (vertical gray line) for MRX *in vivo* nicking. The solid and dashed black lines show the nicking preference (average weighted with S1-seq score) and background (unweighted average), respectively.

**(D-F)** Minor groove width (MGW) calculated along the DNA substrates used in Fig. 4C-D with low (D), medium (E), and high (F) overall melting temperature.

**(G)** The proposed melted DNA structure *in vivo* (top) is aligned with the substrates used in *in vitro* assays as reported in (Trujillo and Sung, 2001) and (Connelly et al., 1998). Corresponding ss/dsDNA junctions are highlighted in red and the dominant nicking sites are indicated. For the *in vivo* structure, regions of high and low melting temperature ( $T_m$ ) are indicated.



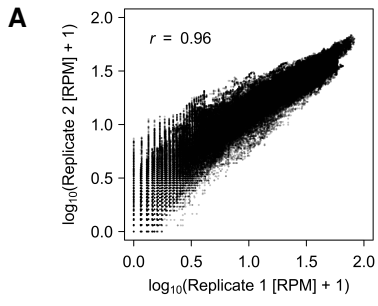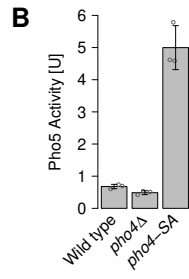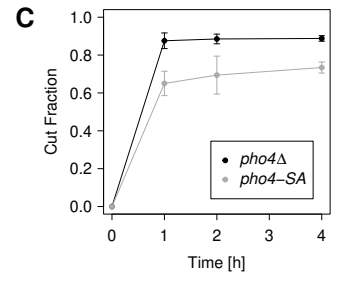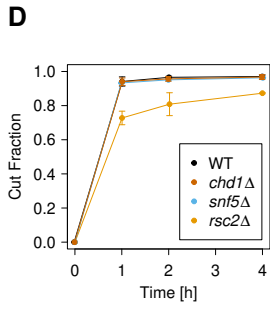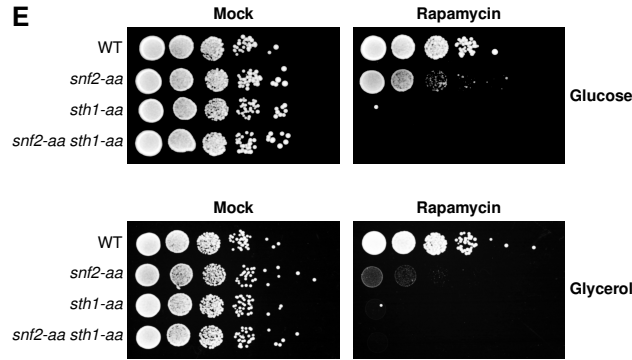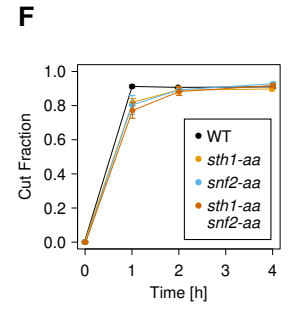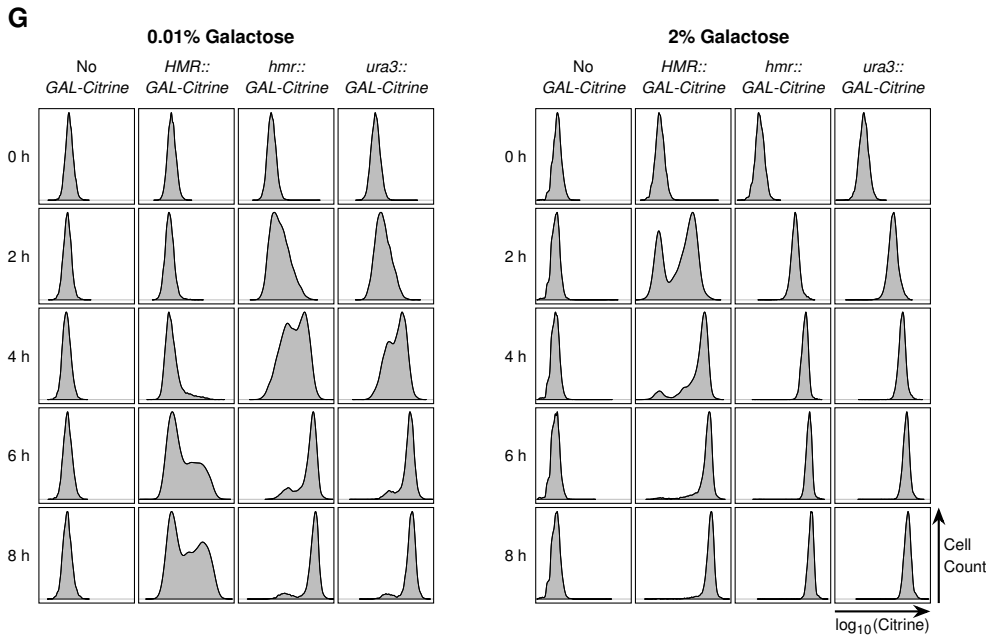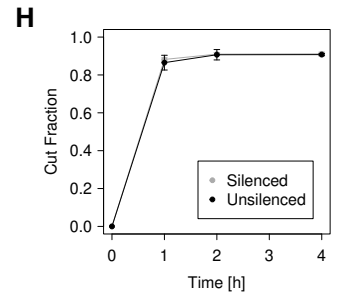

**Figure S5: Impact of nucleosomes and heterochromatin on MRX nicking, related to Figure 5**

**(A)** Reproducibility of MNase-seq assays. MNase-seq scores at each nucleotide position in  $\pm 2$  kbp regions around all DSBs are plotted for two biological replicates (0, 1, 2, and 4 h after SrfI induction). The Pearson's correlation coefficient  $r$  is specified.

**(B)** Pho5 activity associated with cells of the indicated genotypes. See methods section for assay description and unit definition. Individual values (circles) and means (bar heights)  $\pm$  SD (error bars) of three biological replicates are shown.

**(C)** DSB formation kinetics related to Figure 5D. DSB formation at the SrfI cut site engineered into the *PHO5* promoter was monitored in the indicated strains. Data are represented as mean  $\pm$  SD of three biological replicates.

**(D)** DSB formation kinetics related to Figure 5E. DSB formation at the *MATa* HO cut site was monitored in the indicated strains. Data are represented as mean  $\pm$  SD of three biological replicates.

**(E)** Viability of the indicated strains in the presence of 1  $\mu$ g/ml Rapamycin or mock control (1% DMSO). Exponentially growing cells were spotted in a 1:10 dilution series on solid YP media containing the indicated carbon source. As expected, anchoring away Sth1 leads to inviability (Laurent et al., 1992), while anchoring away Snf2 leads to reduced growth, especially when glycerol is the sole carbon source (Neugeborn & Carlson, 1984). Note that the used strains lack *dna2-aa* to prevent Rapamycin-induced inviability due to anchoring away Dna2. A representative example of three biological replicates is shown.

**(F)** DSB formation kinetics related to Figure 5F. DSB formation at *MATa hocs::SrfIcs* was monitored in the indicated strains. Data are represented as mean  $\pm$  SD of three biological replicates.

**(G)** Galactose induction of a *P<sub>GAL1</sub>-Citrine* reporter gene inserted into the *HMR* locus is delayed and suppressed if *HMR* silencing seed sequences are present (*HMR::GAL-Citrine*), but not if they are absent (*hmr::GAL-Citrine*). A background strain (No *GAL-Citrine*) and a strain with the reporter inserted at the unrelated (unsilenced) *URA3* locus (*ura3::GAL-Citrine*) were used as controls. Upon addition of the indicated galactose concentrations, samples were analyzed by flow cytometry at the indicated time points. Citrine fluorescence distributions in the cell populations are plotted. A representative example of three biological replicates is shown. Note the bimodal distributions for low galactose concentrations and/or early time points, which has been observed before and ascribed to the feedback loops in the *GAL* network, resulting in all-or-nothing gene induction (Acar et al., 2005).

**(H)** DSB formation kinetics related to Figure 5H. DSB formation at the HO cut site engineered downstream of *HMR* was monitored in the indicated strains. Data are represented as mean  $\pm$  SD of three biological replicates.

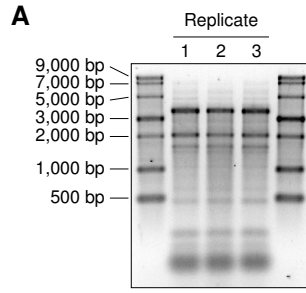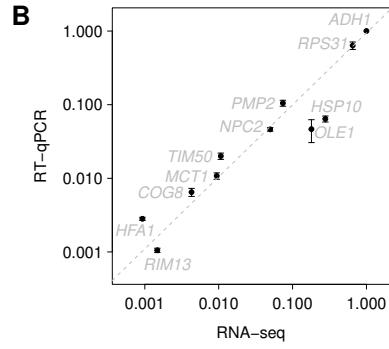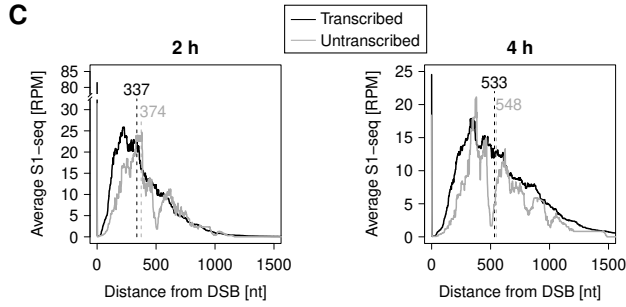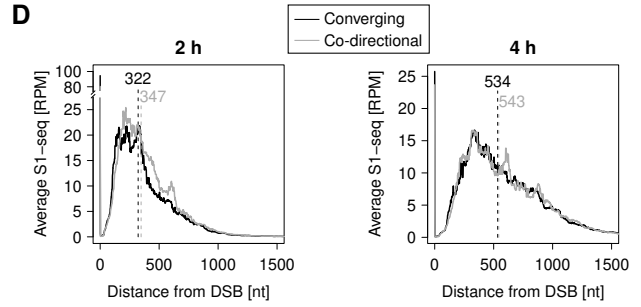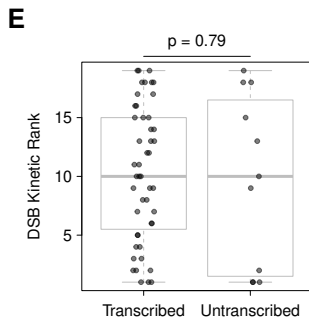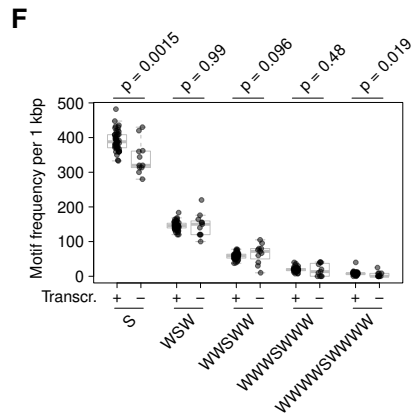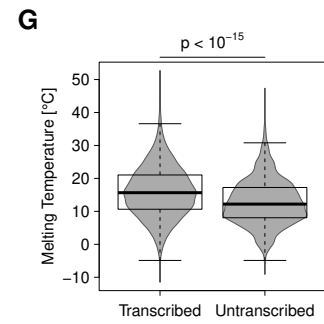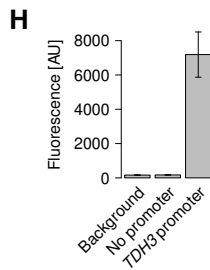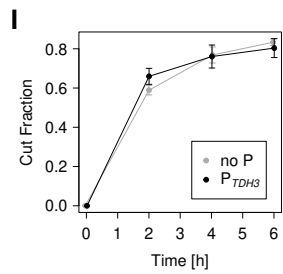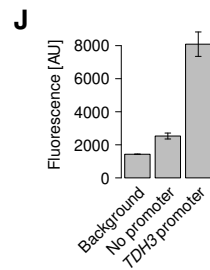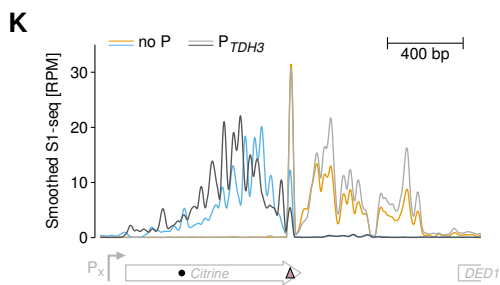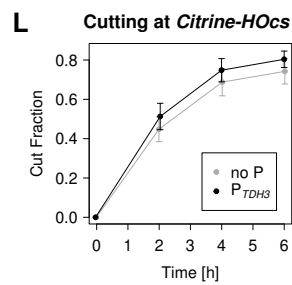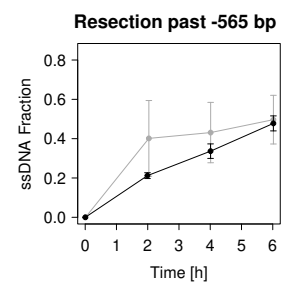

**Figure S6: Transcription impedes MRX nicking, related to Figure 6**

**(A)** Total RNA samples (500 ng) were denatured, subjected to electrophoresis on a  $1 \times$ TBE 1.5% agarose gel, and stained with  $1 \times$ SYBR Gold. The sharpness of the 25S and 18S ribosomal RNA bands (ca. 3.5 and 2 kbp, respectively) indicate good RNA integrity.

**(B)** Confirmation of transcription levels next to DSB formation sites. Reverse Transcription (RT)-qPCR-derived transcript levels (normalized to the *ADH1* transcript level) are plotted versus RNA-seq-derived transcript levels (averaged over the CDS and normalized to the *ADH1* transcript level) from the (Maya-Miles et al., 2019) dataset. Data are represented as mean  $\pm$  SD of three biological replicates. Gene names are indicated. The gray dashed line shows a linear regression. The equation of the regression line is  $\text{RT-qPCR} = 0.00006 + 1.001 \cdot \text{RNA-seq}$  and the regression coefficient is  $R^2 = 0.9993$ , confirming an excellent linear correlation and the applicability of the RNA-seq data set to our strains and culture conditions.

**(C)** Average 51-nt smoothed S1-seq coverage spreading from all DSBs 2 h and 4 h post *Srfl* induction grouped by transcriptional activity. Numbers above vertical dashed lines indicate average spreading distance from DSBs.

**(D)** Average 51-nt smoothed S1-seq coverage spreading from all DSBs 2 h and 4 h post *Srfl* induction in transcribed regions grouped by converging or co-directional orientation of transcription and resection. Numbers above vertical dashed lines indicate average spreading distance from DSBs.

**(E)** DSB formation kinetics of transcribed and untranscribed regions. Data are represented as individual values (derived from Figure S1B) for all DSB-proximal transcribed and untranscribed regions and summarized as box plots. A Mann-Whitney-Wilcoxon test was used to test for a statistically significant difference and the p-value is indicated.

**(F)** Motif frequencies in transcribed and untranscribed regions. Data are represented as individual values for all DSB-proximal transcribed and untranscribed regions and summarized as box plots. Motif sequences are represented as IPUAC codes (W: A or T; S: G or C). Mann-Whitney-Wilcoxon tests were used to test for statistically significant differences and the p-values are indicated.

**(G)** Local melting temperatures (10-bp windows) of transcribed and untranscribed regions. Data were calculated for each nucleotide along all DSB-proximal transcribed and untranscribed regions and represented as bean plots and summarized as box plots. A Mann-Whitney-Wilcoxon test was used to test for a statistically significant difference and the p-value is indicated.

**(H)** mKate2 fluorescence as measured by flow cytometry in strains containing the *P<sub>x</sub>-mKate2-HOcs* reporter construct. Data are represented as mean  $\pm$  SD of three biological replicates.

**(I)** DSB formation kinetics related to Figure 6E. DSB formation at the *P<sub>x</sub>-mKate2-HOcs* reporter construct was monitored in the indicated strains. Data are represented as mean  $\pm$  SD of three biological replicates.

**(J)** Citrine fluorescence as measured by flow cytometry in strains containing the *P<sub>x</sub>-Citrine-HOcs* reporter construct. Data are represented as mean  $\pm$  SD of three biological replicates.

**(K)** 51-nt smoothed S1-seq coverage 2 h post DSB induction around the HO cut site (pink filled triangle) located near the 3' end of the Citrine reporter gene. The filled circle indicates the site where resection was evaluated using a qPCR-based assay, as shown in (L).

**(L)** (Left panel) DSB formation at the *P<sub>x</sub>-Citrine-HOcs* reporter construct. (Right panel) Resection was evaluated at -565 bp from the DSB, as also indicated in (K). Data are represented as mean  $\pm$  SD of three biological replicates.

**Table S1: DNA oligos for the *in vitro* nicking assay substrates, related to Key Resources Table of STAR methods section**

The forward strand was radioactively labeled, unless stated otherwise.

<sup>a</sup>Dir.: Direction (fw: forward, rev: reverse). <sup>b</sup>[BioT]: biotin-dT.

| Substrate/<br>Name                 | Dir. <sup>a</sup> | Sequence <sup>b</sup>                                                                                                                                                                                                                                                                                                                                             |
|------------------------------------|-------------------|-------------------------------------------------------------------------------------------------------------------------------------------------------------------------------------------------------------------------------------------------------------------------------------------------------------------------------------------------------------------|
| A/T                                | fw<br>rev         | GTAAGTGCCGCGGAAATAATATATATAAAATATTATTATAATTTATTAATAAATAATATCACCTCATGCATC<br>GATGCATGAGGTGATATTATTTAATAAAATTATAAAATAATTTATATATATTATTTCCGCGGCACCTTAC                                                                                                                                                                                                                |
| C                                  | fw<br>rev         | GTAAGTGCCGCGGAAATACTATATATAAACATTATTTATACTTTATTAACAATATCACCTCATGCATC<br>GATGCATGAGGTGATATTGTTTAAATAAAAGTATAAAATAATGTTTATATATAGTATTTCGCGGCACCTTAC                                                                                                                                                                                                                  |
| G                                  | fw<br>rev         | GTAAGTGCCGCGGAAATAGTATATATAAAGATTATTTATAGTTTATTAAGAATATCACCTCATGCATC<br>GATGCATGAGGTGATATTCTTTAATAAACTATAAAATAATCTTTATATACTATTTCGCGGCACCTTAC                                                                                                                                                                                                                      |
| Low T <sub>m</sub><br>+ Profile    | fw<br>rev         | GTAAGTGCCGCGTGGACATTAATATTGTGGACATTAATATTGTGGACATTAATATTGCACCTCATGCATC<br>GATGCATGAGGTGCAATATTAATGTCCACAATATTAATGTCCACAATATTAATGTCCACGCGGCACCTTAC                                                                                                                                                                                                                 |
| Low T <sub>m</sub><br>- Profile    | fw<br>rev         | GTAAGTGCCGCGTTTACATTAGGATAGTTTACATTAGGATAGTTTACATTAGGATAGCACCTCATGCATC<br>GATGCATGAGGTGCTATCCTAATGTAAACTATCCTAATGTAAACTATCCTAATGTAAACGCGGCACCTTAC                                                                                                                                                                                                                 |
| Medium T <sub>m</sub><br>+ Profile | fw<br>rev         | GTAAGTGCCGCGGGACAAGATAAGATGGGACAAGATAAGATGGGACAAGATAAGATCACCTCATGCATC<br>GATGCATGAGGTGATCTTATCTTGTCCCATCTTATCTTGTCCCATCTTATCTTGTCCCGCGGCACCTTAC                                                                                                                                                                                                                   |
| Medium T <sub>m</sub><br>- Profile | fw<br>rev         | GTAAGTGCCGCGATGACAAGAGATGAGATGACAAGAGATGAGATGACAAGAGATGAGCACCTCATGCATC<br>GATGCATGAGGTGCTCATCTCTTGTCTCATCTCTTGTCTCATCTCTTGTCTCATCGCGGCACCTTAC                                                                                                                                                                                                                     |
| High T <sub>m</sub><br>+ Profile   | fw<br>rev         | GTAAGTGCCGCGTGGACATAGGAGGGTGGACATAGGAGGGTGGACATAGGAGGGGCACCTCATGCATC<br>GATGCATGAGGTGCCCTCCTATGTCCACCCCTCCTATGTCCACCCCTCCTATGTCCACGCGGCACCTTAC                                                                                                                                                                                                                    |
| High T <sub>m</sub><br>- Profile   | fw<br>rev         | GTAAGTGCCGCGAGGACAGGTGAGGTGAGGACAGGTGAGGTGAGGACAGGTGAGGTGCACCTCATGCATC<br>GATGCATGAGGTGCACCTCACCTGTCTCACCTCACCTGTCTCACCTGTCTCGCGGCACCTTAC                                                                                                                                                                                                                         |
| A/T long                           | fw<br><br>rev     | GTAAGTGCCGCGGAAATAATATATATAAAATATTATTATAATTTATTAATAAATAATATATTATTTATTATA<br>TATTAATATATATTTAAATTTAAATTTATATTTAATATAATGGGTGCCAGGGCGTGCCCTTGGGCTCCC<br>CGGGCGGCTACTCCACCTCATGCATC<br>GATGCATGAGGTGGAGTACGCGCCCGGGAGCCCAAGGGCAGCCCTGGCACCCATTATATTAATATAAA<br>ATTTAAATTTTAAATATATATTAATATATAATAAAATAATATAATATTTTAAATAAATTATAAATAATTTT<br>ATATATATTATTTCCGCGGCACCTTAC |
| C long                             | fw<br><br>rev     | GTAAGTGCCGCGGAAATACTATATATAAACATTATTTATACTTTATTAACAATATATTATCTATTATA<br>TATCAATATATATTCAAAATTTAAACTTATATTTAACATAATGGGTGCCAGGGCGTGCCCTTGGGCTCCC<br>CGGGCGGCTACTCCACCTCATGCATC<br>GATGCATGAGGTGGAGTACGCGCCCGGGAGCCCAAGGGCAGCCCTGGCACCCATTATGTTAAATATAAA<br>GTTTAAATTTTGAATATATATTGATATATAATAGATAATATAATGTTTAAATAAAGTATAAATAATGTTT<br>ATATATAGTATTTCGCGGCACCTTAC     |
| PC210                              | fw                | G [BioT] AAGTGCCGCGGTGCGGGTGCCAGGGCGTGCCCTTGGGCTCCCCGGGCGGCTACTCCACCTCAT<br>GCA [BioT] C                                                                                                                                                                                                                                                                          |
| PC211                              | rev               | GA [BioT] GCATGAGGTGGAGTACGCGCCCGGGAGCCCAAGGGCAGCCCTGGCACCCGACCCGCGGCA<br>CT [BioT] AC                                                                                                                                                                                                                                                                            |

**Table S2: Quantitative PCR primers used in this study, related to Key Resources Table of STAR methods section**

<sup>a</sup>Dir.: Direction (fw: forward, rev: reverse).

| Name   | Amplicon                                                                                     | Dir. <sup>a</sup> | Sequence                     |
|--------|----------------------------------------------------------------------------------------------|-------------------|------------------------------|
| oRG46  | <i>MATa</i> HO cut site ( <i>HOcs</i> )                                                      | fw                | TCAATGATTAAAAATAGCATAGTCGGGT |
| oRG47  | <i>MATa HOcs</i>                                                                             | rev               | CGTCAACCACTCTACAAAACCA       |
| oRG50  | <i>RsaI</i> cut site ( <i>RsaIcs</i> ) @ <i>HOcs</i> +98 bp                                  | fw                | TGGTGACGGATATTGGGAAGA        |
| oRG51  | <i>RsaIcs</i> @ <i>HOcs</i> +98 bp                                                           | rev               | CGCCACGACCACACTCTATA         |
| oRG52  | <i>RsaIcs</i> @ <i>HOcs</i> +640 bp                                                          | fw                | ACTTATCTTTATCTTATTCGCCTTCTTG |
| oRG53  | <i>RsaIcs</i> @ <i>HOcs</i> +640 bp                                                          | rev               | GAGAAGACTGTGGCGAAGA          |
| oRG54  | <i>ADH1</i>                                                                                  | fw                | GTTAAGGGCTGGAAGATCGG         |
| oRG55  | <i>ADH1</i>                                                                                  | rev               | TTGTTGAAAAGAACCCTCGT         |
| oRG341 | <i>SrfIcs</i> @ chrII:256173                                                                 | fw                | CCTTGACTTTTAGCGTGAAGA        |
| oRG342 | <i>SrfIcs</i> @ chrII:256173                                                                 | rev               | TGGCCATTGTTTGCCTTTATAT       |
| oRG496 | <i>HMR-HOcs</i> (@ chrIII:295659)                                                            | fw                | GTGACACCCAGGTTGCCG           |
| oRG497 | <i>HMR-HOcs</i> (@ chrIII:295659)                                                            | rev               | AATGTCATCAAAAAGCGGGC         |
| oRG641 | <i>mKate2-T<sub>CYC2</sub>-HOcs</i>                                                          | fw                | ACGTGTAGTAACTCTTTGAAAGCT     |
| oRG642 | <i>mKate2-T<sub>CYC2</sub>-HOcs</i>                                                          | rev               | TGATTACGCCAAGCTCGAAA         |
| oRG645 | <i>Citrine-HOcs-HA</i>                                                                       | fw                | CCAAAGATCCAAACGAAAAGAGA      |
| oRG646 | <i>Citrine-HOcs-HA</i>                                                                       | rev               | GCCTGTCTCGAGTTAAGCGT         |
| oRG709 | <i>AluI</i> cut site ( <i>AluIcs</i> ) @ <i>mKate2-T<sub>CYC2</sub>(242 bp)-HOcs</i> -431 bp | fw                | ATTGGTTGGTGGTGGTCATT         |
| oRG710 | <i>AluIcs</i> @ <i>mKate2-T<sub>CYC2</sub>(242 bp)-HOcs</i> -431 bp                          | rev               | CAACGTAATAAACACCTGGCATT      |
| oRG711 | <i>AluIcs</i> @ <i>mKate2-T<sub>CYC2</sub>(153 bp)-HOcs</i> -435 bp                          | fw                | CTGATGGTGGTTTGGAAAGT         |
| oRG712 | <i>AluIcs</i> @ <i>mKate2-T<sub>CYC2</sub>(153 bp)-HOcs</i> -435 bp                          | rev               | CCACCAACCAATTTCAAAGC         |
| oRG721 | <i>StyI</i> cut site ( <i>StyIcs</i> ) @ <i>Citrine-HOcs</i> -591 bp                         | fw                | TTTCTGTCTCCGGTGAAGGT         |
| oRG722 | <i>StyIcs</i> @ <i>Citrine-HOcs</i> -591 bp                                                  | rev               | GGCATGGCAGACTTGAAAAA         |
| oRG723 | <i>AluIcs</i> @ <i>Citrine-hisG-HOcs</i> -542 bp                                             | fw                | GCCATGCCAGAAGGTTATGT         |
| oRG724 | <i>AluIcs</i> @ <i>Citrine-hisG-HOcs</i> -542 bp                                             | rev               | ATTCCAATTTGTGACCTAAAATGT     |
| oRG790 | <i>P<sub>PHO5</sub>-SrfI</i> cut site ( <i>SrfIcs</i> )                                      | fw                | GCAGCGCACATAAGATGACT         |
| oRG791 | <i>P<sub>PHO5</sub>-SrfIcs</i>                                                               | rev               | GTCGCACGCTCTCTTTACAG         |
| oRG802 | <i>MseI</i> cut site ( <i>MseIcs</i> ) @ <i>P<sub>PHO5</sub>-SrfIcs</i> -223 bp              | fw                | GTGTGAGTGCCAAGGTTGTA         |
| oRG803 | <i>MseIcs</i> @ <i>P<sub>PHO5</sub>-SrfIcs</i> -223 bp                                       | rev               | TTTTCCGATAGAACGCAACTG        |
| oRG806 | <i>MseIcs</i> @ <i>P<sub>PHO5</sub>-SrfIcs</i> -538 bp                                       | fw                | AGAGTAGTATGGTCCGGCAC         |
| oRG807 | <i>MseIcs</i> @ <i>P<sub>PHO5</sub>-SrfIcs</i> -538 bp                                       | rev               | GCGCTGATGTTTTGCTAAGTC        |
| oRG808 | <i>MseIcs</i> @ <i>HMR-HOcs</i> -607 bp                                                      | fw                | TTCTTAAAGTGTGCCAGCG          |
| oRG809 | <i>MseIcs</i> @ <i>HMR-HOcs</i> -607 bp                                                      | rev               | TCCGGGTCTGGTAATGGATG         |
| oRG876 | <i>COG8</i>                                                                                  | fw                | GCAAAGTGAAGGCGAAGAT          |
| oRG877 | <i>COG8</i>                                                                                  | rev               | TCAGCCTTGTCTTCTGTTTTGT       |
| oRG878 | <i>HFA1</i>                                                                                  | fw                | ACAGAGCAGTAGTGGAGTTCA        |
| oRG879 | <i>HFA1</i>                                                                                  | rev               | TGTCCACCAACCTAGTTAGCT        |
| oRG882 | <i>HSP10</i>                                                                                 | fw                | ACCGTGTCCTTGTCCAAAGA         |
| oRG883 | <i>HSP10</i>                                                                                 | rev               | CCTACGGCAACAACCTCAGC         |
| oRG888 | <i>MCT1</i>                                                                                  | fw                | CCGGTCTGGTTGATGATTTAGAG      |
| oRG889 | <i>MCT1</i>                                                                                  | rev               | GGAAGGGGATGTTGTATGGG         |
| oRG892 | <i>NPC2</i>                                                                                  | fw                | CCCACCAACACCAACCCAA          |
| oRG893 | <i>NPC2</i>                                                                                  | rev               | AGACCTCACCGTTAGCAGAA         |
| oRG896 | <i>OLE1</i>                                                                                  | fw                | GACAGAAGAACCCTCGTGA          |
| oRG897 | <i>OLE1</i>                                                                                  | rev               | CAGTTGGGAATTCGTGGTGG         |
| oRG898 | <i>PMP2</i>                                                                                  | fw                | TGATGAGCACGTTACCAGGT         |
| oRG899 | <i>PMP2</i>                                                                                  | rev               | TGGTAGAAATGATGGCGATACA       |
| oRG903 | <i>RIM13</i>                                                                                 | fw                | CCTTAAACAAGACGTGCCCA         |
| oRG904 | <i>RIM13</i>                                                                                 | rev               | CCGTATCGAGGCAAGCAATT         |
| oRG907 | <i>RPS31</i>                                                                                 | fw                | TGAGATTGAGAGGTGGTGGT         |
| oRG908 | <i>RPS31</i>                                                                                 | rev               | ACCTTCAGCATCGACCTTGT         |
| oRG909 | <i>TIM50</i>                                                                                 | fw                | CAAGTCCCCTCGATTTGA           |
| oRG910 | <i>TIM50</i>                                                                                 | rev               | TAAATGTTTGCCCGCCATT          |

**Table S3: Adapter and primer oligonucleotides used for deep-sequencing library preparation, related to Key Resources Table of STAR methods section**

<sup>a</sup>Dir.: Direction (fw: forward, rev: reverse). <sup>b</sup>Modified bases are denoted as follows: /5Phos/: 5'-phosphate, N: random nucleotide, /3InvdT/: 3' inverted Thymidine, \*: phosphorothioate bond, and /5BiosG/: 5' Biotin. Lowercase letters indicate barcode indices.

| Name   | Target/Usage                      | Dir. <sup>a</sup> | Sequence <sup>b</sup>                                                                      |
|--------|-----------------------------------|-------------------|--------------------------------------------------------------------------------------------|
| oRG462 | 1st adapter (P5) – version 1      | rev               | /5Phos/CGTCTGCA <sup>N</sup> NNNNNNNNNNNNNNAGATCGGAAGAGCGCTGGT/3InvdT/                     |
| oRG463 | 1st adapter (P5) – version 1      | fw                | /5BiosG/CACGACGCTCTTCCGATCTNNNNNNNNNNNNCTGCAGACG* <sup>T</sup>                             |
| oRG316 | 2nd adapter (P7) – version 1      | fw                | /5Phos/GATCGGAAGAGCACACGTCTGAAC <sup>T</sup> CCAGTCAC/3InvdT/                              |
| oRG464 | 2nd adapter (P7) – version 1      | rev               | GTGACTGGAGTTCAGACGTGTGCTCTTCCGATC* <sup>T</sup>                                            |
| oRG729 | 1st adapter (P5) – version 2 & 3  | fw                | /5BiosG/ACACTCTTCCCTACAGCAGCGCTCTCCGATC* <sup>T</sup>                                      |
| oRG730 | 1st adapter (P5) – version 2 & 3  | rev               | /5Phos/GATCGGAAGAGCGTCTGTAGGAAAGAGT/3InvdT/                                                |
| oRG731 | 2nd adapter (P7) – version 2      | fw                | /5Phos/GTAGCGTGA <sup>N</sup> NNNNNNNNNNNNNNAGATCGGAAGAGCACACGTCTGAACTCCAGTCAC/3InvdT/     |
| oRG732 | 2nd adapter (P7) – version 2      | rev               | GTGACTGGAGTTCAGACGTGTGCTCTCCGATCTNNNNNNNNNNNGCTTACGCTAC* <sup>T</sup>                      |
| oRG816 | 2nd adapter (P7) #1 – version 3   | fw                | /5Phos/GTCACTGAGCATNNNNNNNNNNNNNNAGATCGGAAGAGCACACGTCTGAACTCCAGTCAC/3InvdT/                |
| oRG817 | 2nd adapter (P7) #1 – version 3   | rev               | GTGACTGGAGTTCAGACGTGTGCTCTCCGATCTNNNNNNNNNNMATGCTCAGTCAC* <sup>T</sup>                     |
| oRG818 | 2nd adapter (P7) #2 – version 3   | fw                | /5Phos/TCAGTACGAGT <sup>C</sup> NNNNNNNNNNNNNNNNAGATCGGAAGAGCACACGTCTGAACTCCAGTCAC/3InvdT/ |
| oRG819 | 2nd adapter (P7) #2 – version 3   | rev               | GTGACTGGAGTTCAGACGTGTGCTCTCCGATCTNNNNNNNNNNNAGCTCGTACTGA* <sup>T</sup>                     |
| oRG820 | 2nd adapter (P7) #3 – version 3   | fw                | /5Phos/CAGCAGTCTTGANNNNNNNNNNNNNAGATCGGAAGAGCACACGTCTGAACTCCAGTCAC/3InvdT/                 |
| oRG821 | 2nd adapter (P7) #3 – version 3   | rev               | GTGACTGGAGTTCAGACGTGTGCTCTCCGATCTNNNNNNNNNNNTCAAGACTGCTG* <sup>T</sup>                     |
| oRG822 | 2nd adapter (P7) #4 – version 3   | fw                | /5Phos/AGTTGCACTCA <sup>N</sup> NNNNNNNNNNNNNNAGATCGGAAGAGCACACGTCTGAACTCCAGTCAC/3InvdT/   |
| oRG823 | 2nd adapter (P7) #4 – version 3   | rev               | GTGACTGGAGTTCAGACGTGTGCTCTCCGATCTNNNNNNNNNNCGTGATGCAACT* <sup>T</sup>                      |
| oRG827 | TrueSeq Universal adapter 3' part | fw                | ACACTCTTCCCTACACGAGCGCTCTCCGATC* <sup>T</sup>                                              |
| oRG828 | TrueSeq Universal adapter 3' part | rev               | /5Phos/GATCGGAAGAGCACACGTCTGAACTCCAGTCAC                                                   |
| oRG318 | TrueSeq Adapter (P5)              | fw                | AATGATACGGCGACCCAGAGATCTACTCTTTCCCTACAGCAGCGCTCTCCGATCT                                    |
| oRG757 | TrueSeq Adapter (P7), Index 1     | rev               | CAAGCAGAAGACGGCATACGAGATcgtagtGTGACTGGAGTTTCAGACGTGTG                                      |
| oRG758 | TrueSeq Adapter (P7), Index 2     | rev               | CAAGCAGAAGACGGCATACGAGATacatcggTGACTGGAGTTTCAGACGTGTG                                      |
| oRG498 | TrueSeq Adapter (P7), Index 3     | rev               | CAAGCAGAAGACGGCATACGAGATgctaaGTGACTGGAGTTTCAGACGTGTG                                       |
| oRG319 | TrueSeq Adapter (P7), Index 4     | rev               | CAAGCAGAAGACGGCATACGAGATtggcaGTGACTGGAGTTTCAGACGTGTG                                       |
| oRG320 | TrueSeq Adapter (P7), Index 5     | rev               | CAAGCAGAAGACGGCATACGAGATcactgtGTGACTGGAGTTTCAGACGTGTG                                      |
| oRG321 | TrueSeq Adapter (P7), Index 6     | rev               | CAAGCAGAAGACGGCATACGAGATattggcGTGACTGGAGTTTCAGACGTGTG                                      |
| oRG322 | TrueSeq Adapter (P7), Index 7     | rev               | CAAGCAGAAGACGGCATACGAGATgatctGTGACTGGAGTTTCAGACGTGTG                                       |
| oRG759 | TrueSeq Adapter (P7), Index 8     | rev               | CAAGCAGAAGACGGCATACGAGATcaagtGTGACTGGAGTTTCAGACGTGTG                                       |
| oRG760 | TrueSeq Adapter (P7), Index 9     | rev               | CAAGCAGAAGACGGCATACGAGATctgatcGTGACTGGAGTTTCAGACGTGTG                                      |
| oRG761 | TrueSeq Adapter (P7), Index 10    | rev               | CAAGCAGAAGACGGCATACGAGATaagctGTGACTGGAGTTTCAGACGTGTG                                       |
| oRG762 | TrueSeq Adapter (P7), Index 11    | rev               | CAAGCAGAAGACGGCATACGAGATgtagccGTGACTGGAGTTTCAGACGTGTG                                      |
| oRG763 | TrueSeq Adapter (P7), Index 12    | rev               | CAAGCAGAAGACGGCATACGAGATcaagGTGACTGGAGTTTCAGACGTGTG                                        |
| oRG764 | TrueSeq Adapter (P7), Index 13    | rev               | CAAGCAGAAGACGGCATACGAGATttagctGTGACTGGAGTTTCAGACGTGTG                                      |
| oRG765 | TrueSeq Adapter (P7), Index 14    | rev               | CAAGCAGAAGACGGCATACGAGATggaactGTGACTGGAGTTTCAGACGTGTG                                      |
| oRG766 | TrueSeq Adapter (P7), Index 15    | rev               | CAAGCAGAAGACGGCATACGAGATgacatGTGACTGGAGTTTCAGACGTGTG                                       |
| oRG767 | TrueSeq Adapter (P7), Index 16    | rev               | CAAGCAGAAGACGGCATACGAGATggaaggGTGACTGGAGTTTCAGACGTGTG                                      |
| oRG768 | TrueSeq Adapter (P7), Index 18    | rev               | CAAGCAGAAGACGGCATACGAGATgcggaaccGTGACTGGAGTTTCAGACGTGTG                                    |
| oRG769 | TrueSeq Adapter (P7), Index 19    | rev               | CAAGCAGAAGACGGCATACGAGATtttcaaccGTGACTGGAGTTTCAGACGTGTG                                    |
